# Supplementary material for: Prospective evaluation of echocardiographic parameters and cardiac biomarkers in healthy dogs eating four custom-formulated diets
Source: Frontiers journal article supplement (doi:10.3389/fanim.2023.1271202), 2023-10-06
Supplement: Data_Sheet_1.zip [file Data_Sheet_1.zip]

Supplementary Material

# Supplemental Table 2. Comparing cardiac measurements to ideal body weight and actual body weight

|  |  | **P-values** | | | | | | |
| --- | --- | --- | --- | --- | --- | --- | --- | --- |
| **Parameters** |  | **TRT** | **Day** | **Breed** | **TRT*Day** | **TRT*Breed** | **Day*Breed** | **TRT*Day*Breed** |
| LVIDdN1 | Actual Body Weight | 0.2619 | <0.0001 | <0.0001 | 0.0117 | 0.346 | 0.8914 | **0.0007** |
| LVIDsN2 | 0.1350 | 0.0060 | 0.7280 | 0.0074 | 0.0484 | 0.3633 | **0.0025** |
| LIVDdN | Ideal Body Weight | 0.4037 | 0.0066 | 0.0016 | 0.1097 | 0.6262 | 0.5629 | **0.0387** |
| LIVDsN | 0.1702 | 0.2041 | 0.5693 | 0.0124 | 0.0227 | 0.482 | **0.0178** |
| *BSA* |  |  |  |  |  |  |  |  |
| EDVI | Actual Body Weight | **0.0489** | **0.0016** | **<0.0001** | 0.1523 | 0.4614 | 0.5055 | 0.9999 |
| ESVI | **0.0266** | **<0.0001** | **<0.0001** | 0.3791 | 0.2357 | 0.1352 | 0.7974 |
| EDVI | Ideal Body Weight | 0.2646 | 0.0929 | **<0.0001** | 0.1793 | 0.4568 | 0.8702 | 0.8244 |
| ESVI | 0.0723 | **0.0003** | **<0.0001** | 0.2439 | 0.2051 | 0.2743 | 0.2614 |
| *Volume* |  |  |  |  |  |  |  |  |
| EDVI | Actual Body Weight | **0.0233** | **<0.0001** | 0.6156 | 0.1317 | 0.2614 | 0.5976 | 0.9997 |
| ESVI | **0.0084** | **<0.0001** | 0.2851 | 0.3043 | 0.0715 | 0.1656 | 0.7980 |
| EDVI | Ideal Body Weight | 0.0668 | 0.1306 | 0.2997 | 0.9263 | 0.1198 | 0.5575 | 0.9671 |
| ESVI | 0.0125 | 0.0008 | 0.3678 | 0.3020 | **0.0273** | 0.1589 | 0.3768 |

LVIDdN=left ventricular internal diameter at end-diastole normalized; LVIDsN=left ventricular internal diameter at end-systole normalized; BSA=body surface area; EDVI=left ventricular end-diastolic volume indexed; ESVI=left ventricular end-systole volume indexed.

1 exponent 0.299

2 exponent 0.387
