# Supplementary material for: Prospective evaluation of echocardiographic parameters and cardiac biomarkers in healthy dogs eating four custom-formulated diets
Source: Frontiers journal article supplement (doi:10.3389/fanim.2023.1271202), 2023-10-06
Supplement: Data_Sheet_1.zip [file Data_Sheet_1.zip]

### *Supplementary Material*

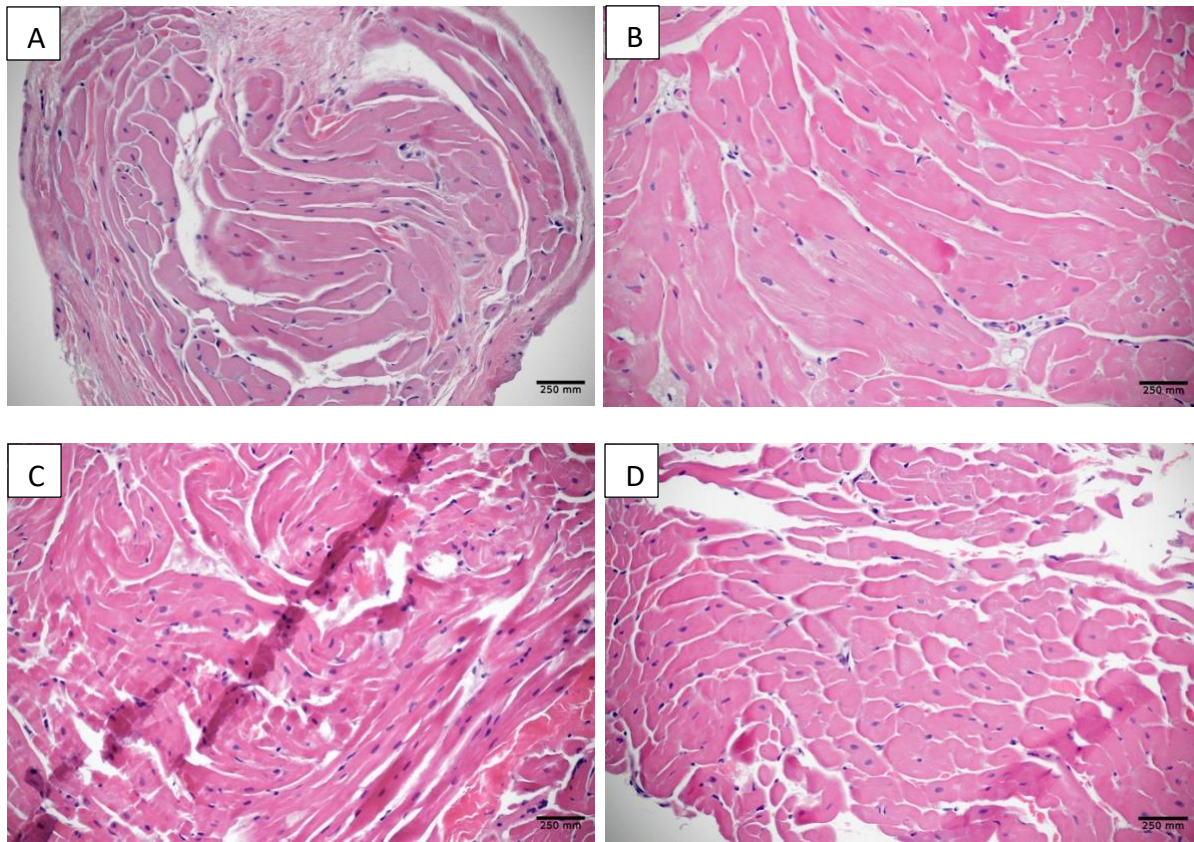

**Supplementary Figure 2.** Representative histopathologic images of endomyocardial biopsies obtained from dogs eating either the HAGI (A), LAGF (B), LAGI (C), or HAGF (D) diet at the end of the study on days 175-184 hematoxylin and eosin stain, 20x magnification. HAGI: high animal protein grain-inclusive diet; LAGF: low animal protein grain-free diet; LAGI: low animal protein grain-inclusive diet; HAGF: high animal protein grain-free diet.
