# Supplementary material for: Prospective evaluation of echocardiographic parameters and cardiac biomarkers in healthy dogs eating four custom-formulated diets
Source: Frontiers journal article supplement (doi:10.3389/fanim.2023.1271202), 2023-10-06
Supplement: Data_Sheet_1.zip [file Data_Sheet_1.zip]

## Supplementary Material

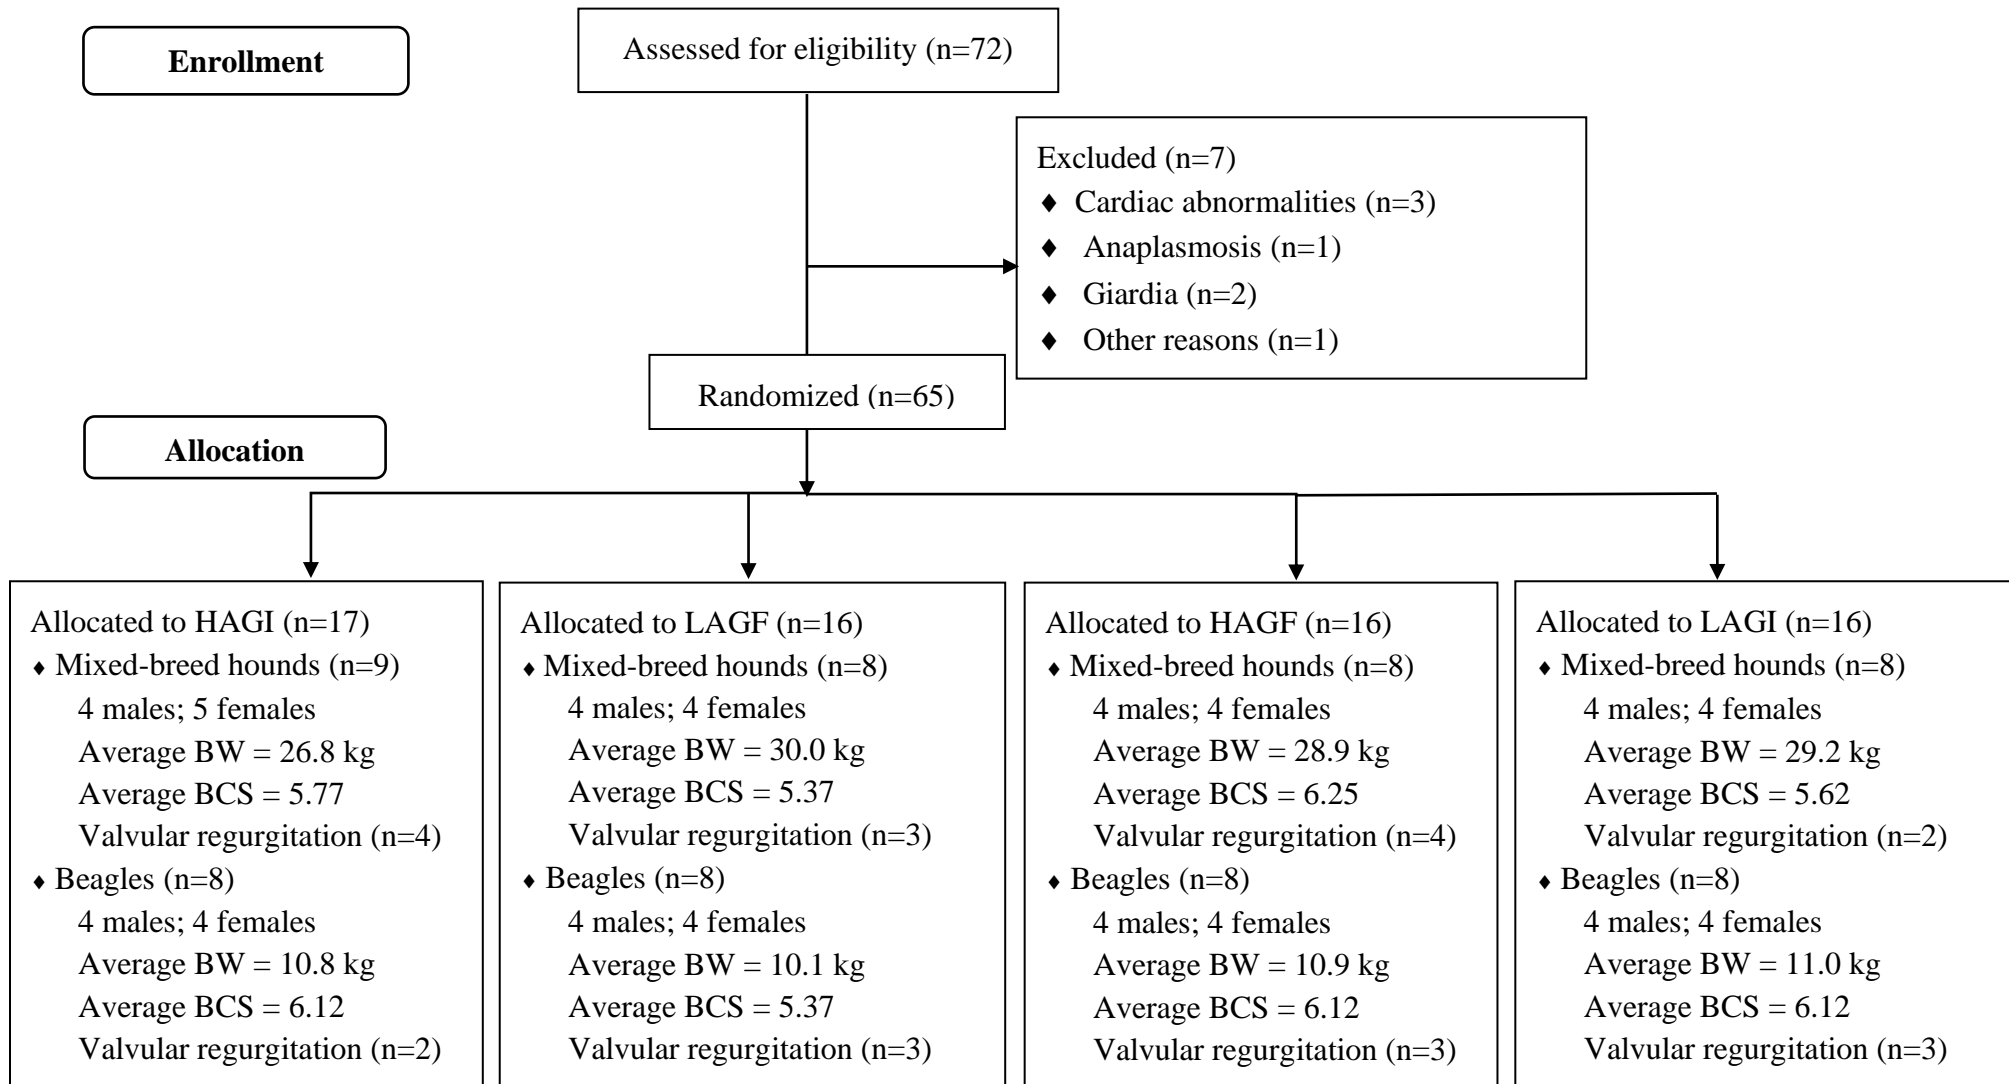

**Supplementary Figure 1.** Consort diagram of enrollment and allocation of dogs

BCS=body condition scores on a 9-point scale with a 5 out of 9 being ideal body weight

HAGI=high-animal grain-inclusive; LAGF=low-animal grain-free; HAGF=high-animal grain-free; LAGI=low-animal grain-inclusive
